## Effects of Propofol and Thiopental on Maternal and Fetal Cardiovascular and Acid-base Variables in the Pregnant Ewe

Eli Alon, M.D.,\* Robert H. Ball, M.D.,† Mark H. Gillie, M.D.,‡ Julian T. Parer, M.D., Ph.D.,§  
 Mark A. Rosen, M.D.,|| Sol M. Shnider, M.D. #

**Background:** The effects of propofol on uterine blood flow are not understood well. This is a relatively new agent that is finding increased use for nonobstetric surgical procedures during pregnancy and induction of anesthesia for cesarean section.

**Methods:** The effects of induction and maintenance of anesthesia with propofol were studied on maternal and fetal cardiovascular and acid-base variables in a chronically instrumented pregnant sheep model. Anesthesia was induced with a 2 mg/kg bolus of propofol and maintained with one of three continuous infusions: 150, 300, and 450  $\mu\text{g} \cdot \text{kg}^{-1} \cdot \text{min}^{-1}$ . The control group received thiopental for induction, and anesthesia was maintained with isoflurane.

**Results:** The use of propofol did not adversely affect maternal or fetal mean arterial pressure, heart rate, or base excess, fetal heart rate variability, or uterine blood flow. Uterine blood

flow transiently decreased during induction and intubation with thiopental but remained stable during induction with propofol. However, administration of succinylcholine for intubation in the presence of propofol resulted in a transient, but severe, maternal bradycardia. Continuous infusion of 300  $\mu\text{g} \cdot \text{kg}^{-1} \cdot \text{min}^{-1}$  of propofol appeared to provide satisfactory anesthesia in the ewe.

**Conclusions:** Assuming the applicability of ovine data to humans, these findings suggest that induction and maintenance of anesthesia with propofol and 50% nitrous oxide in oxygen has no adverse fetal effects but warrants caution because of the potential risk of severe maternal bradycardia during induction of anesthesia using the combination of propofol and succinylcholine. (Key words: Anesthesia, intravenous: propofol; thiopental. Anesthesia, obstetrics: maternal; fetal; cardiovascular effects; acid-base status. Complications: bradycardia.)

\* Visiting Research Fellow, Department of Anesthesia, University of California, San Francisco. Current address: Department of Anesthesiology, University Hospital, Zurich, Switzerland.

† Fellow, Department of Obstetrics, Gynecology and Reproductive Sciences, University of California, San Francisco.

‡ Fellow, Department of Anesthesia, University of California, San Francisco.

§ Professor, Department of Obstetrics, Gynecology and Reproductive Sciences and Cardiovascular Research Institute, University of California, San Francisco.

|| Associate Professor and Vice Chairman, Department of Anesthesia, Associate Professor, Department of Obstetrics, Gynecology and Reproductive Sciences, University of California, San Francisco.

# Professor and Vice Chairman, Department of Anesthesia, Professor, Department of Obstetrics, Gynecology and Reproductive Sciences, University of California, San Francisco.

Received from the Departments of Anesthesia and Obstetrics, Gynecology, and Reproductive Sciences, University of California, San Francisco, California, and the Department of Anesthesiology, University Hospital, Zurich, Switzerland. Accepted for publication December 1, 1992. Presented at the Annual Meeting of the Society of Obstetrical Anesthesia and Perinatology, Boston, Massachusetts, May 22-27, 1991, and at the Annual Meeting of the American Society of Anesthesiologists, San Francisco, California, October 26-30, 1991.

Address reprint requests to Dr. Alon: Department of Anesthesiology, University Hospital, 100 Rämistrasse, 8091 Zurich, Switzerland.

GENERAL anesthesia often is indicated for surgery during pregnancy or for fetal or maternal indications for cesarean delivery. For example, in cases of severe fetal distress, general anesthesia must be induced rapidly to facilitate emergency cesarean section. Although there is no ideal agent for induction and/or maintenance of general anesthesia, a recently approved intravenous hypnotic, propofol, may be a good choice for the pregnant patient. In patients undergoing cesarean section, it apparently provides a rapid loss of consciousness, minimal cardiovascular and respiratory depression, rapid recovery, and potentially, no adverse neonatal effects.<sup>1-5</sup>

Propofol has been studied extensively in both animals<sup>6</sup> and humans,<sup>7</sup> but little is known of its effects on uterine blood flow. In the current study, we examined propofol's effects on these factors in pregnant ewes, a conventional model for studies of maternal-fetal physiology. Our purpose was to compare the effects on maternal and fetal cardiovascular and acid-base variables of a widely used technique of anesthesia for cesarean section, *i.e.*, thiopental induction followed by isoflurane inhalation anesthesia, with propofol for

5. Celleno D, Capogna G, Tomassetti M, Costantino P, DiFeo G, Nisini R: Neurobehavioral effects of propofol on the neonate following elective Caesarean section. *Br J Anaesth* 62:649-654, 1989
6. Runciman WB, Mather LE, Selby DG: Cardiovascular effects of propofol and of thiopentone anaesthesia in the sheep. *Br J Anaesth* 65:353-359, 1990
7. Langley MS, Heel RC: Propofol: A review of its pharmacodynamic and pharmacokinetic properties and use as an intravenous anaesthetic. *Drugs* 35:334-372, 1988
8. Knopf K, Parer JT, Espinoza MI, Horton JLA, AJ Gunn, Williams CE, Gluckman PD, Parer WJ: Comparison of mathematical indices of fetal heart rate variability with visual assessment in the human and sheep. *J Dev Physiol* 16:367-372, 1991
9. Thomson SJ: Bradycardia after propofol infusion (correspondence). *Anaesthesia* 41:430, 1986
10. Baraka A: Severe bradycardia following propofol-suxamethonium sequence. *Br J Anaesth* 61:482-483, 1988
11. James MFM, Reyneke CJ, Whiffler K: Heart block following propofol: A case report. *Br J Anaesth* 62:213-215, 1989
12. Cullen PM, Turtle M, Prys-Roberts WL, Dye J: Effects of propofol on baroreflex activity in humans. *Anesth Analg* 66:1115-1120, 1987
13. McCollum JSC, Dundee JW: Comparison of induction characteristics of four intravenous anaesthetic agents. *Anaesthesia* 41:995-1000, 1986
14. Coates DP, Monk CR, Prys-Roberts C, Turtle M, Norley I, Spelina KR: Haemodynamic responses to induction and endotracheal intubation with propofol/nitrous oxide anaesthesia. *Eur J Anaesthesiol* 3:65-66, 1986
15. Coates DP, Monk CR, Prys-Roberts C, Turtle M: Hemodynamic effects of infusions of the emulsion formulation of propofol during nitrous oxide anaesthesia in humans. *Anesth Analg* 66:64-70, 1987
16. Palahniuk RJ, Cumming M: Foetal deterioration following thiopentone-nitrous oxide anaesthesia in the pregnant ewe. *Can J Anaesth* 24:361-370, 1977
17. Jouppila P, Kuikka J, Louppila R, Hollmen A: Effect of induction of general anesthesia for Cesarean section on intervillous blood flow. *Acta Obstet Gynecol Scand* 58:249-253, 1979
18. Levinson G, Shnider SM, Gildea JL, deLorimier AA: Maternal and fetal cardiovascular and acid-base changes during ketamine anaesthesia in pregnant ewes. *Br J Anaesth* 45:1111-1115, 1973
19. Mofid M, Brinkman CR III, Assali NS: Effects of diazepam on uteroplacental and fetal hemodynamics and metabolism. *Obstet Gynecol* 41:364-368, 1973
